# Supplementary material
Source: PubMed Central journal article supplement (PMC2917973)
Supplement: NIHMS217936-supplement-1_si_001.pdf [file NIHMS217936-supplement-1_si_001.pdf]

**A Non-Templated Approach for Tuning the Spectral Properties of cyanine-based  
Fluorescent NanoGUMBOS**

Susmita Das,<sup>1</sup> David Bwambok,<sup>1</sup> Bilal El-Zahab,<sup>1</sup> Joshua Monk,<sup>2</sup> Sergio L. de Rooy,<sup>2</sup> Santhosh Challa,<sup>1</sup> Min Li,<sup>1</sup> Francisco R. Hung,<sup>2</sup> Gary A. Baker,<sup>3</sup> Isiah M Warner<sup>1,\*</sup>

*<sup>1</sup>Department of Chemistry, Louisiana State University, Baton Rouge, Louisiana-70803*

*<sup>2</sup>Cain Department of Chemical Engineering, Louisiana State University, Baton Rouge,  
Louisiana-70803*

*<sup>3</sup>Chemical Sciences Division, Oak Ridge National Laboratory, Oak Ridge,  
Tennessee 37831*

**SUPPORTING INFORMATION**

\* To whom correspondence should be made: [iwarner@lsu.edu](mailto:iwarner@lsu.edu)

**Table S1. Elemental analysis of HMT GUMBOS**

| NIR GUMBOS               | C      |       | H      |       | N      |       |
|--------------------------|--------|-------|--------|-------|--------|-------|
|                          | Theory | Found | Theory | Found | Theory | Found |
| [HMT][AOT]               | 70.82  | 69.38 | 8.49   | 8.63  | 3.37   | 3.35  |
| [HMT][NTf <sub>2</sub> ] | 53.98  | 53.99 | 4.82   | 4.79  | 6.09   | 6.19  |
| [HMT][TFPB]              | 64.31  | 61.97 | 5.21   | 4.92  | 4.05   | 3.61  |
| [HMT][BETI]              | 50.72  | 50.19 | 4.19   | 4.21  | 5.34   | 5.32  |
| [HMT][TFP4B]             | 47.02  | 50.91 | 3.18   | 4.66  | 1.29   | 0.84  |

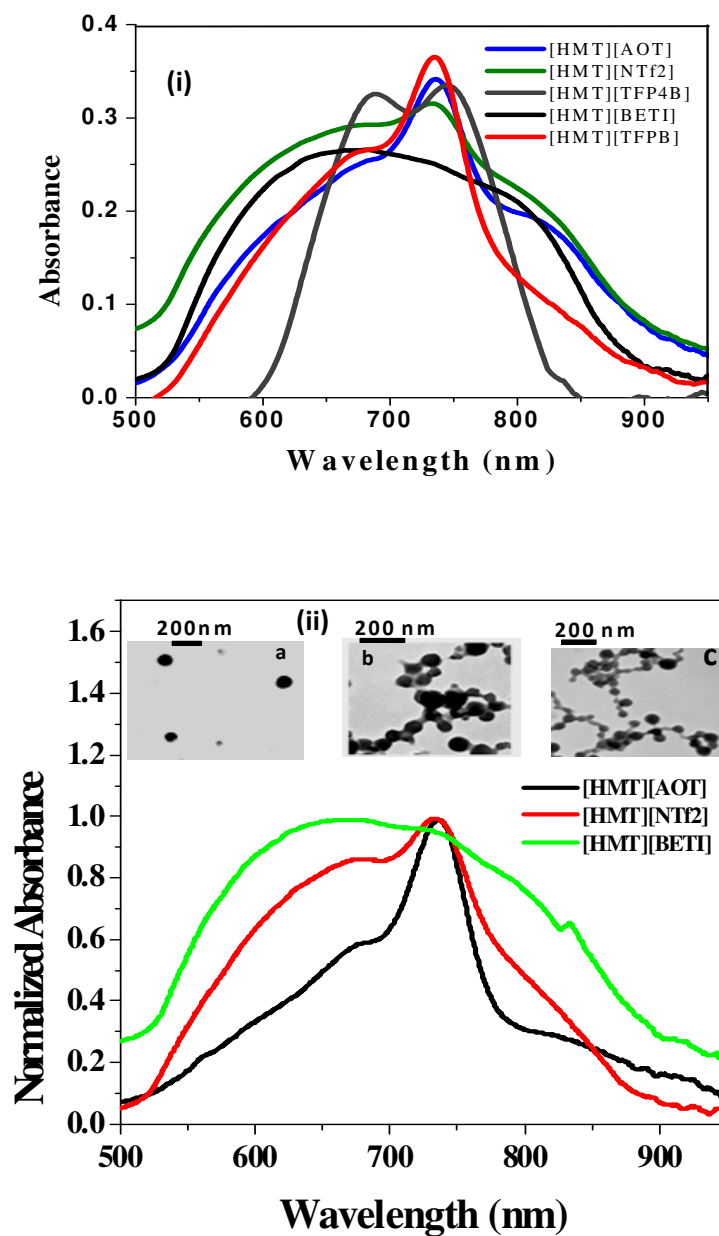

Figure S1. (i) Normalized absorption spectra of HMT nanoGUMBOS (ii) Normalized absorption spectra of same sized (~ 70 nm) HMT nanoparticles, inset TEM images of (a) [HMT][AOT], (b) [HMT][NTf<sub>2</sub>] and (c) [HMT][BETI]

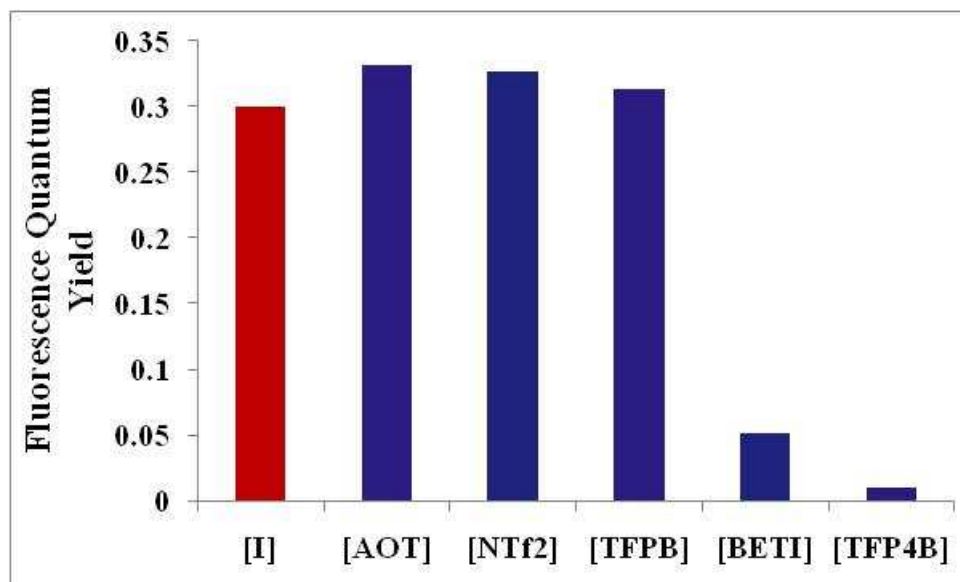

**Figure S2.** Fluorescence quantum yield of the HMT nanoGUMBOS (blue) and [HMT][I] (red) in Water Obtained with ICG as a standard.

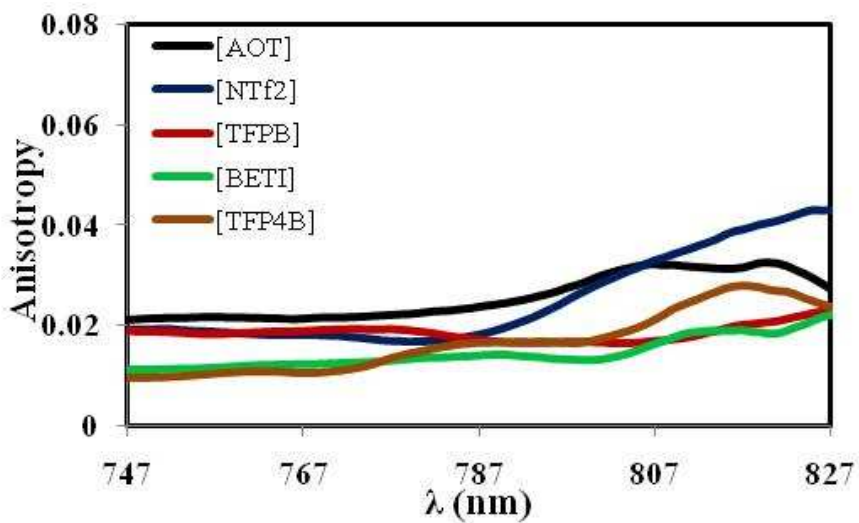

**Figure S3.** Fluorescence emission anisotropy of dilute ethanolic solutions of HMT anion pairs

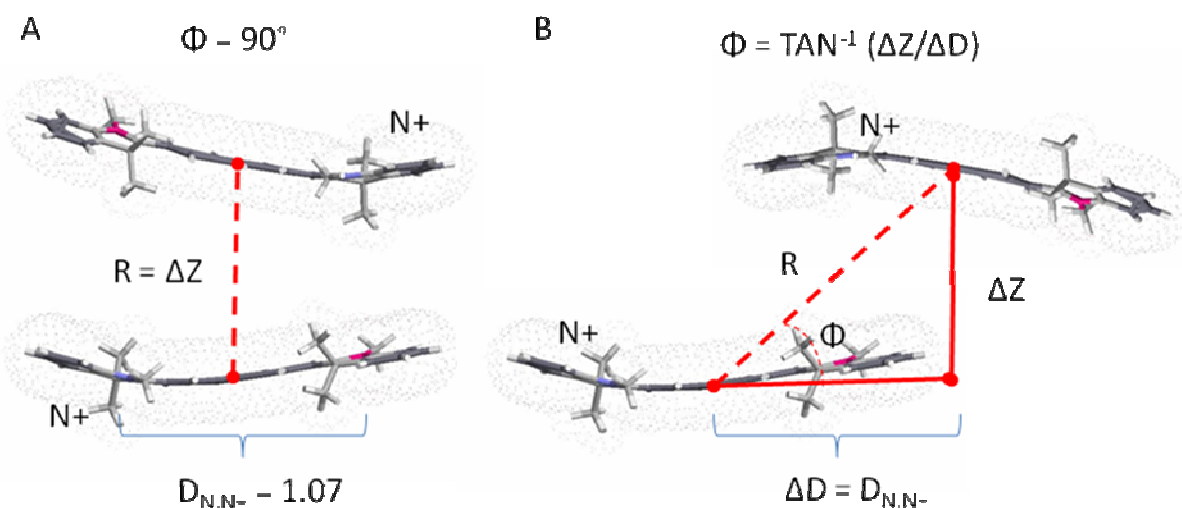

**Figure S4.** Postulated cation assemblies for a HMT H-aggregate (A) and a HMT J-aggregate (B). Stacking angle,  $\Phi$ , depends on  $\Delta Z$  and  $\Delta D$ . A) HMT as a perfect H-aggregate,  $\Phi = 90$ . B) HMT as a perfect J-aggregate,  $\Phi_{\text{tran}} = \text{TAN}^{-1}(\Delta Z/D_{N,N+})$ .

### Characterization by $^1\text{H}$ NMR and $^{19}\text{F}$ NMR

**[HMT][NTf<sub>2</sub>]**,  $^1\text{H}$  NMR (400 MHz, DMSO-*d*<sub>6</sub>),  $\delta$  (ppm): 7.84 (d, 1H), 7.55 (m, 1H), 7.39 (d, 1H), 7.37 (s, 1H), 7.35 (s, 1H), 7.34 (s, 1H), 7.24 (s, 1H), 7.22 (s, 1H), 7.20 (s, 1H), 7.08 (s, 1H), 7.06 (s, 1H), 6.52 (t, 1H), 6.07 (d, 1H), 5.30 (s, 2H), 3.57 (s, 6H), 1.68 (s, 6H), 1.57 (s, 6H).  $^{19}\text{F}$  NMR (236 MHz, DMSO-*d*<sub>6</sub>),  $\delta$  (ppm): -79.2

**[HMT][BETI]**,  $^1\text{H}$  NMR (400 MHz, DMSO-*d*<sub>6</sub>),  $\delta$  (ppm): 7.83 (d, 1H), 7.56 (m, 1H), 7.39 (d, 1H), 7.37 (s, 1H), 7.35 (s, 1H), 7.34 (s, 1H), 7.24 (s, 1H), 7.21 (s, 1H), 7.20 (s, 1H), 7.08 (s, 1H), 7.06 (s, 1H), 6.52 (t, 1H), 6.07 (d, 1H), 5.31 (s, 2H), 3.56 (s, 6H), 1.68 (s, 6H), 1.57 (s, 6H).  $^{19}\text{F}$  NMR (236 MHz, DMSO-*d*<sub>6</sub>),  $\delta$  (ppm): -79.0, -79.2 .

**[HMT][TFPB]**,  $^1\text{H}$  NMR (400 MHz, DMSO-*d*<sub>6</sub>),  $\delta$  (ppm): 8.51 (s, 1H), 8.15 (s, 2H), 7.84 (d, 1H), 7.55 (m, 1H), 7.39 (d, 1H), 7.37 (s, 1H), 7.35 (s, 1H), 7.34 (s, 1H), 7.24 (s, 1H), 7.22 (s, 1H), 7.20 (s, 1H), 7.08 (s, 1H), 7.06 (s, 1H), 6.52 (t, 1H), 6.07 (d, 1H), 5.30 (s, 2H), 3.57 (s, 6H), 1.68 (s, 6H), 1.57 (s, 6H).  $^{19}\text{F}$  NMR (236 MHz, DMSO-*d*<sub>6</sub>),  $\delta$  (ppm): -62.7, -63.0, -63.1.

**[HMT][TFP4B]**,  $^1\text{H}$  NMR (400 MHz, DMSO-*d*<sub>6</sub>),  $\delta$  (ppm): 7.84 (d, 1H), 7.55 (m, 1H), 7.50 (s, 4H), 7.39 (d, 1H), 7.37 (s, 1H), 7.35 (s, 1H), 7.34 (s, 1H), 7.26 (s, 8H), 7.24 (s, 1H), 7.22 (s, 1H),

7.20 (s, 1H), 7.08 (s, 1H), 7.06 (s, 1H), 6.52 (t, 1H), 6.07 (d, 1H) , 5.30 (s, 2H), 3.57 (s, 6H), 3.25 (s, 24H), 1.68 (s, 6H), 1.57 (s, 6H).  $^{19}\text{F}$  NMR (236 MHz, DMSO- $d_6$ ),  $\delta$  (ppm): -71.8.

**[HMT][AOT]**,  $^1\text{H}$  NMR (400 MHz, DMSO- $d_6$ ),  $\delta$  (ppm): 7.82 (d, 1H), 7.55 (m, 1H), 7.38 (d, 1H), 7.37 (s, 1H), 7.35 (s, 1H), 7.34 (s, 1H), 7.24 (s, 1H), 7.22 (s, 1H), 7.20 (s, 1H), 7.08 (s, 1H), 7.06 (s, 1H), 6.52 (t, 1H), 6.07 (d, 1H) , 5.30 (s, 2H), 6.23 (t, 1H), 4.24 (d, 4H), 4.95 (d, 2H), 2.35 (m, 2H), 3.57 (s, 6H), 1.68 (s, 6H), 1.57 (s, 6H), 1.54 (m, 4H), 1.25 (m, 10H), 0.84 (t, 12H).

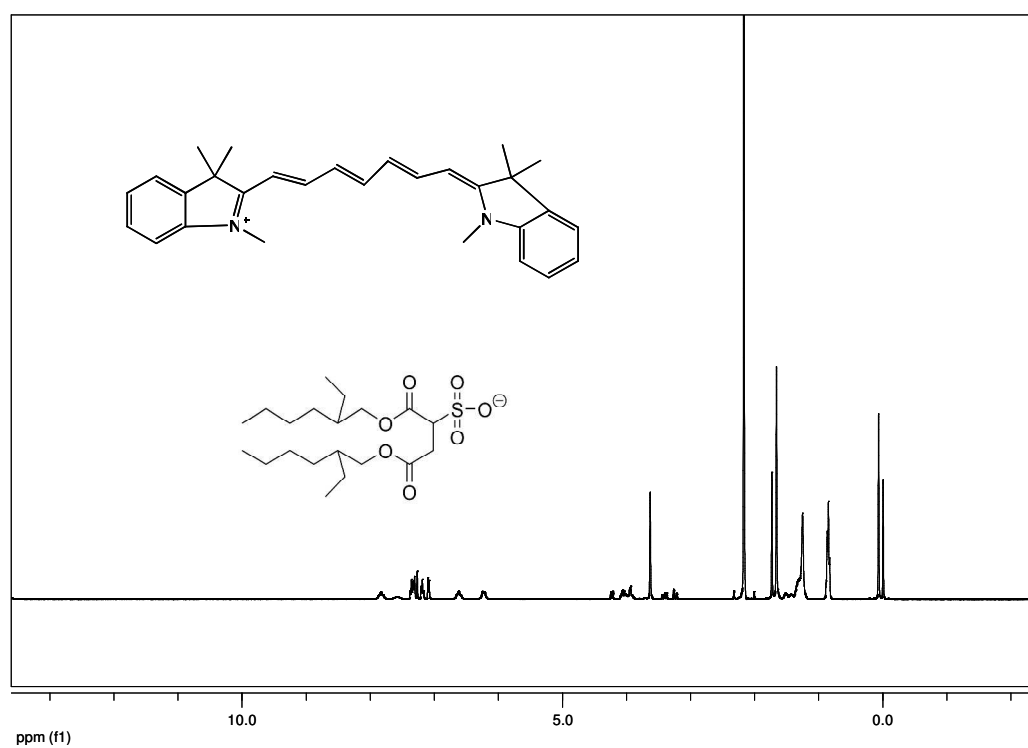

**Figure S5-1.**  $^1\text{H}$  NMR ( $\text{CDCl}_3$ , 400MHz) of [HMT][AOT].

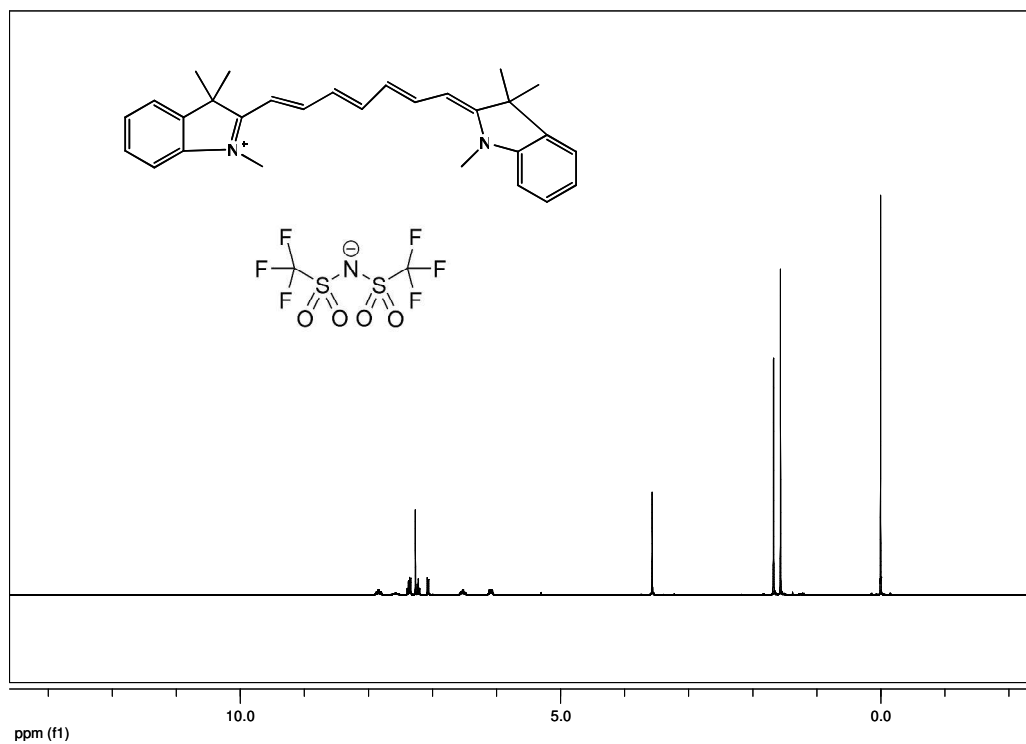

**Figure S5-2a.**  $^1\text{H}$  NMR (CDCl<sub>3</sub>, 400MHz) of [HMT][NTf<sub>2</sub>].

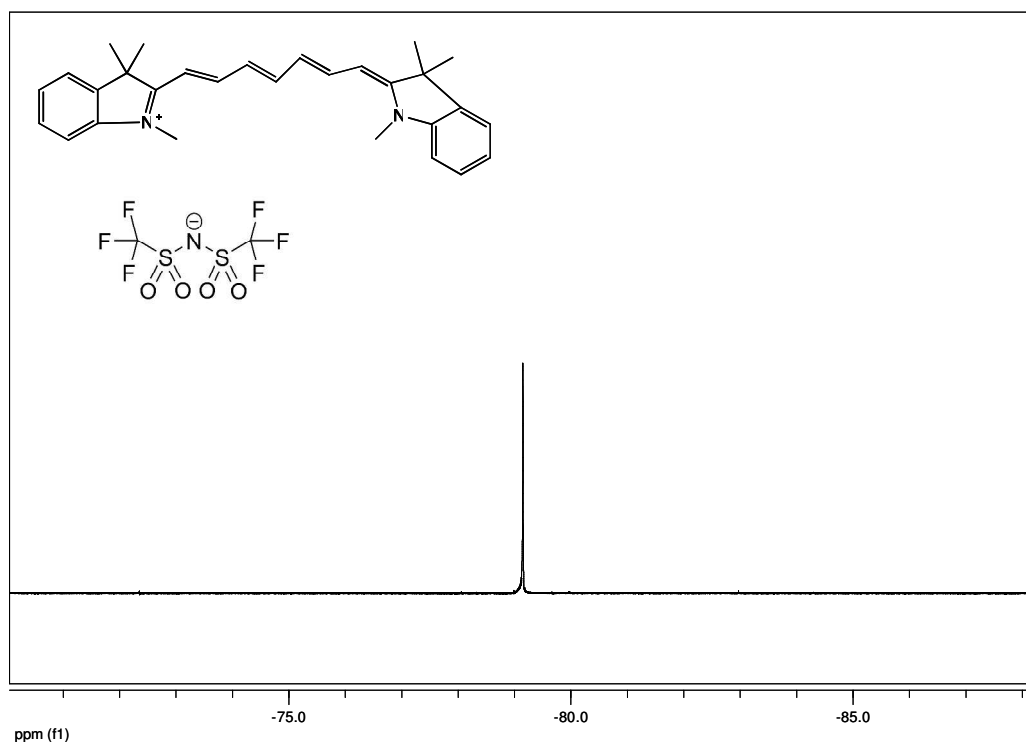

**Figure S5-2b.**  $^{19}\text{F}$  NMR (CDCl<sub>3</sub>, 236MHz) of [HMT][NTf<sub>2</sub>].

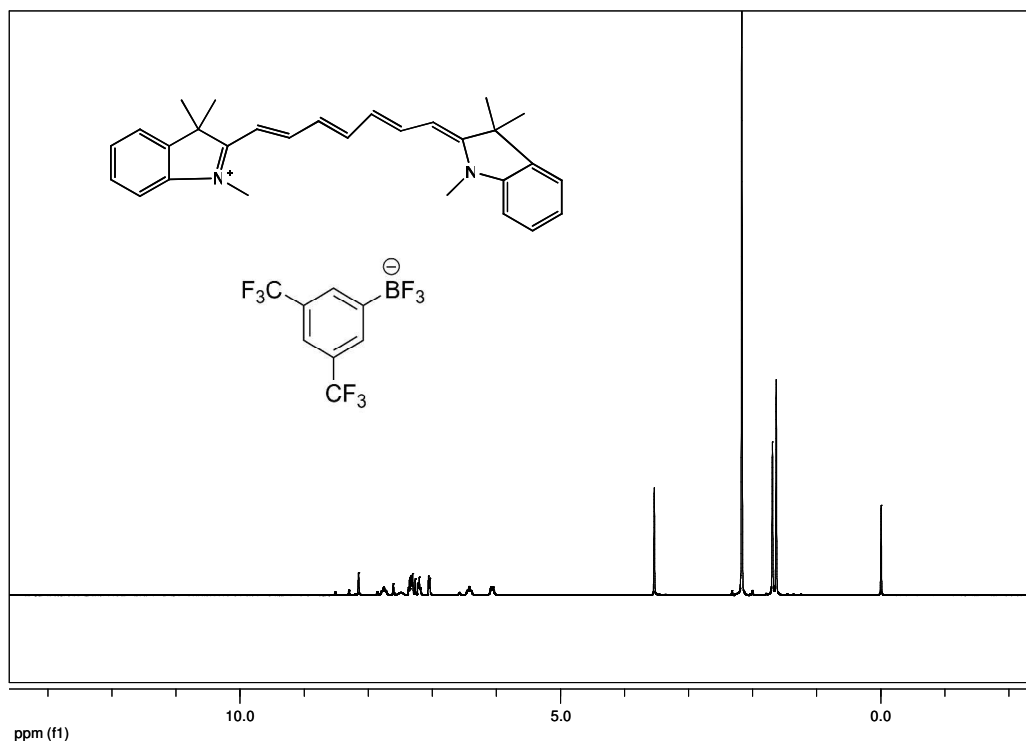

**Figure S5-3a.**  $^1\text{H}$  NMR ( $\text{CDCl}_3$ , 400MHz) of [HMT]TFPB]

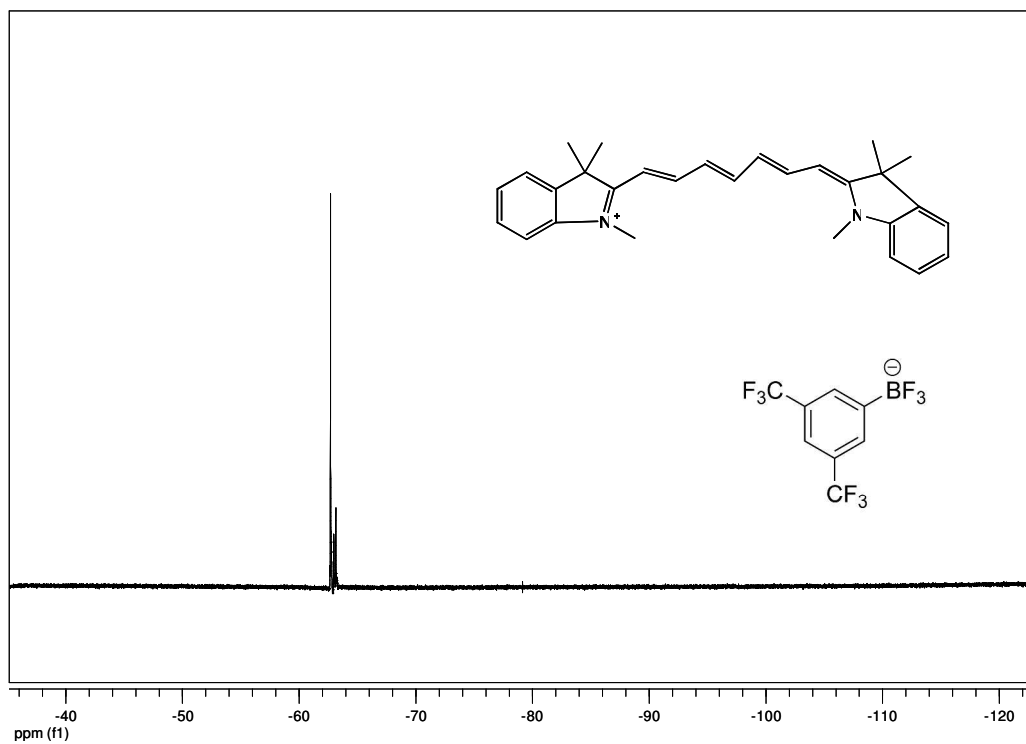

**Figure S5-3b.**  $^{19}\text{F}$  NMR ( $\text{CDCl}_3$ , 236MHz) of [HMT][TFPB].



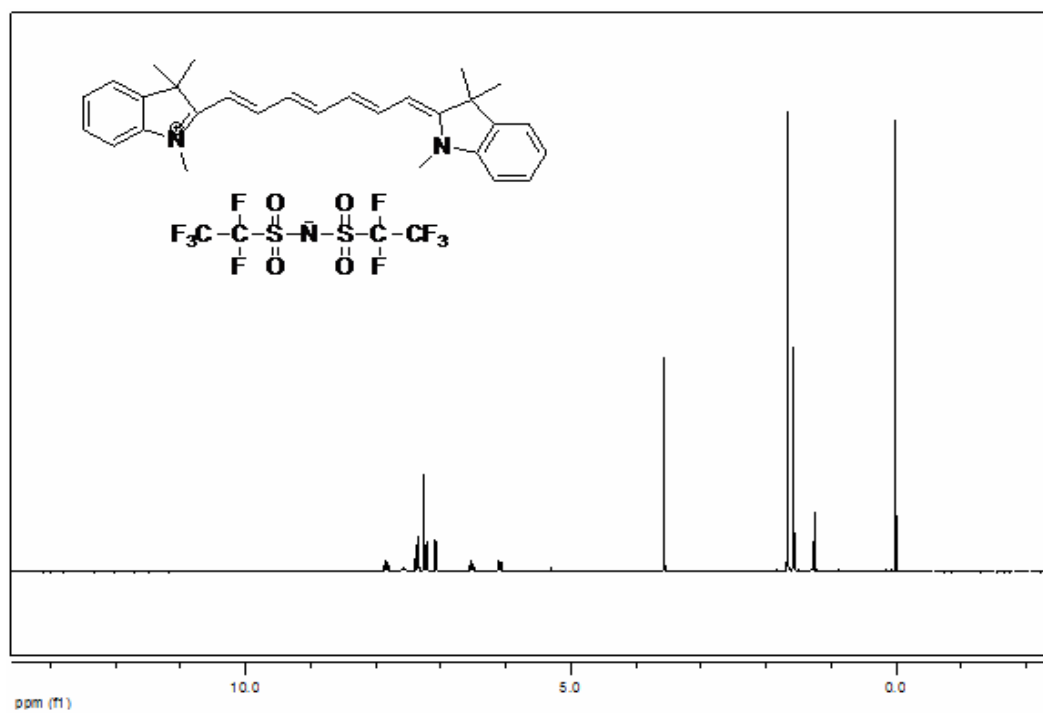

**Figure S5-4a.**  $^1\text{H}$  NMR ( $\text{CDCl}_3$ , 400MHz) of [HMT][BETI]

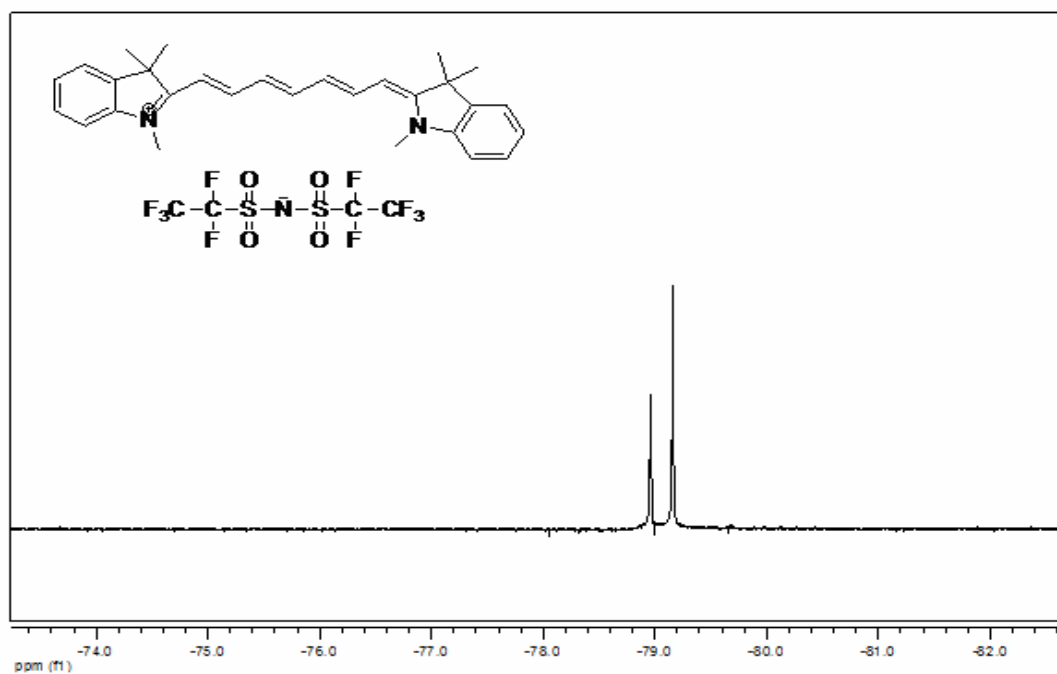

**Figure S5-4b.**  $^{19}\text{F}$  NMR ( $\text{CDCl}_3$ , 236MHz) of [HMT][BETI]

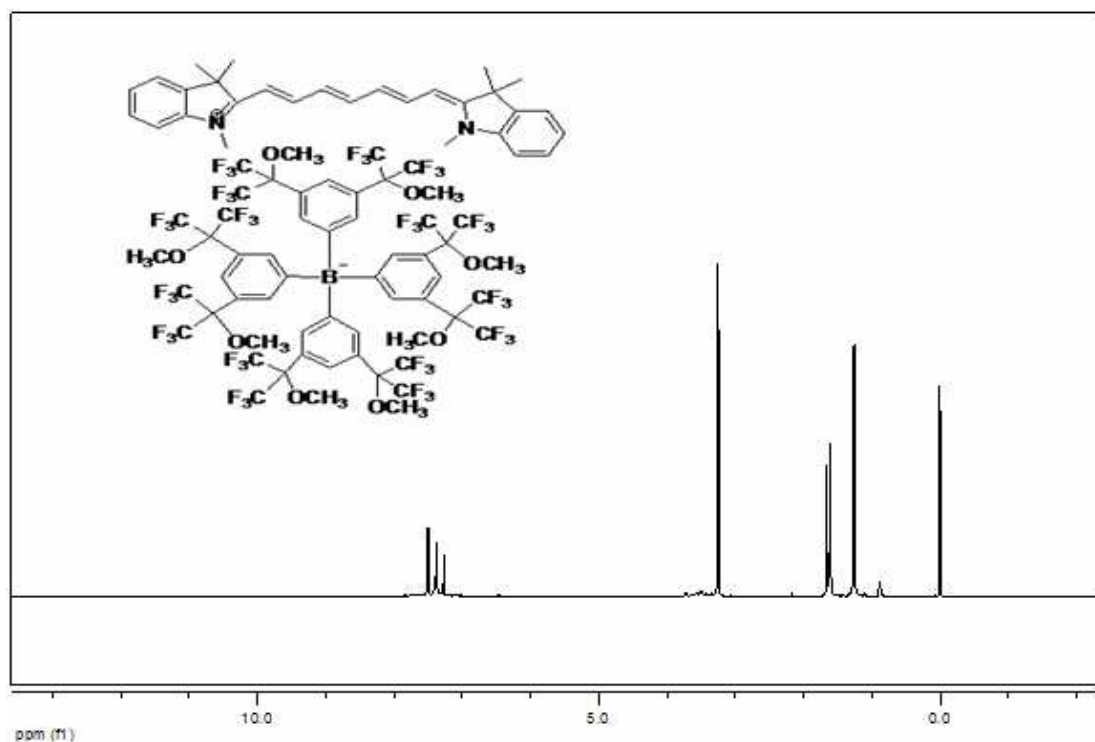

Figure S5-5a.  $^1\text{H}$  NMR ( $\text{CDCl}_3$ , 400MHz) of  $[\text{HMT}][\text{TFP4B}]$

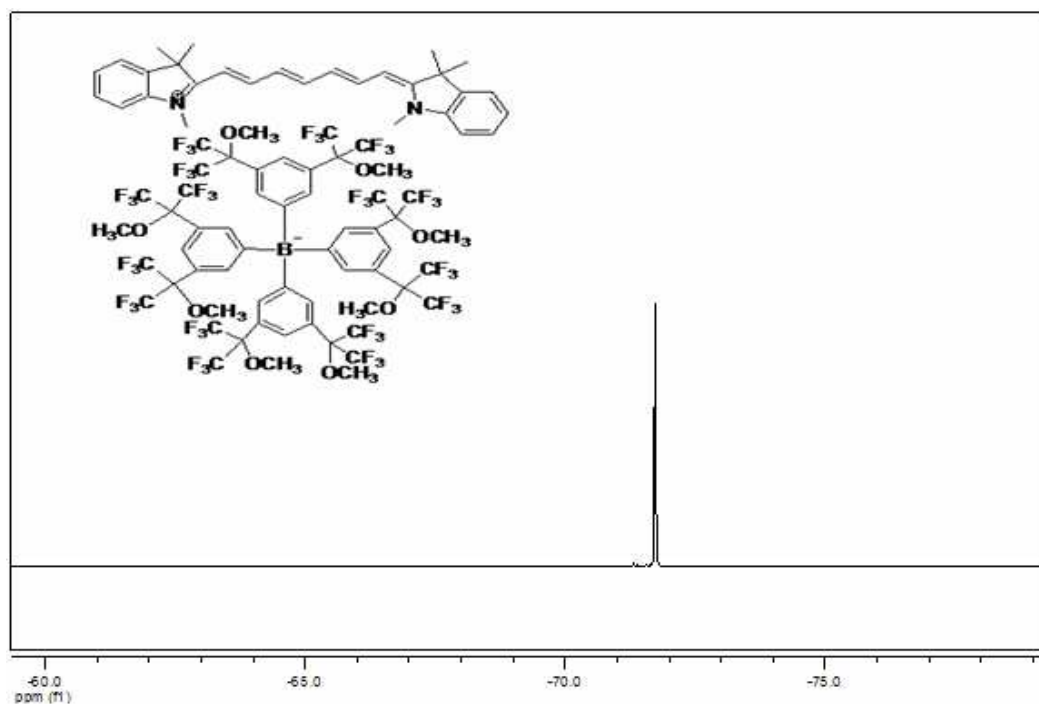

Figure S5-5b.  $^{19}\text{F}$  NMR ( $\text{CDCl}_3$ , 236MHz) of  $[\text{HMT}][\text{TFP4B}]$
